# Supplementary material for: Exploring genomic analysis and methylome profiling in longitudinal series of p.G12C KRAS mutated NSCLC patients treated with Sotorasib
Source: Research Square preprint supplement (doi:10.21203/rs.3.rs-7860201/v1), 2025-10-15
Supplement: Supplementary file 4 [file d05b11064efca0eade7729fb.docx]

| **ID sample** | **Collection point** | **cfDNA concentration (ng/μl)** | **% cfDNA** |  | **ID sample** | **Collection point** | **cfDNA concentration (ng/μl)** | **% cfDNA** |
| --- | --- | --- | --- | --- | --- | --- | --- | --- |
| **ID01** | T0 | 0.1 | 78.0% |  | **ID12** | T0 | 0.1 | NA |
| T1 | 0.1 | 74.0% |  | T1 | 0.1 | 64.0% |
| Tr | 0.1 | 75.0% |  | T2 | 0.1 | NA |
| **ID02** | T0 | 0.3 | 81.0% |  | T3 | 0.1 | 70.0% |
| T1 | 0.1 | 79.0% |  | T4 | 0.1 | 67.0% |
| Tr | 0.2 | 87.0% |  | T5 | 0.1 | 67.0% |
| **ID03** | T0 | 0.1 | 79.0% |  | T6 | 0.1 | 64.0% |
| T1 | 0.1 | NA |  | **ID13** | T0 | 0.1 | 56.0% |
| T2 | 0.1 | NA |  | T1 | 0.3 | 64.0% |
| Tr | NA | NA |  | T2 | 0.4 | 76.0% |
| **ID04** | T0 | 0.1 | NA |  | T3 | 0.4 | 74.0% |
| T1 | 0.2 | 81.0% |  | T4 | 0.2 | 55.0% |
| **ID05** | T0 | 0.1 | 76.0% |  | T5 | 0.3 | 57.0% |
| T1 | 0.1 | 74.0% |  | Tr | 0.2 | 75.0% |
| T2 | 0.1 | 73.0% |  | **ID14** | T0 | 0.2 | 66.0% |
| T3 | 0.1 | 74.0% |  | T1 | 0.2 | 52.0% |
| T4 | 0.1 | 81.0% |  | Tr | 0.3 | 57.0% |
| T5 | 0.1 | 71.0% |  | **ID15** | T0 | 0.2 | 62.0% |
| T6 | 0.1 | 82.0% |  | T1 | 0.1 | NA |
| T7 | 0.1 | 77.0% |  | T2 | 0.1 | 81.0% |
| **ID06** | T0 | 0.1 | 81.0% |  | Tr | 0.1 | 62.0% |
| T1 | 0.1 | 71.0% |  | **ID16** | T0 | 0,2 | 83.0% |
| T2 | 0.1 | 78.0% |  | T1 | 0.1 | 79.0% |
| Tr | 0.1 | 83.0% |  | T2 | 0.1 | 74.0% |
| **ID07** | T0 | 0.1 | NA |  | T3 | 0.1 | 76.0% |
| T1 | 0.1 | 66.0% |  | Tr | 0.3 | 83.0% |
| T2 | 0.1 | 73.0% |  | **ID17** | T0 | 0.8 | 83.0% |
| Tr | 0.2 | 77.0% |  | Tr | 0.4 | 78.0% |
| **ID08** | T0 | 0.1 | 67.0% |  | **ID18** | T0 | 0.2 | 80.0% |
| T1 | 0.9 | 91.0% |  | T1 | 0.2 | 78.0% |
| T2 | 1.3 | 92.0% |  | Tr | 0.2 | 74.0% |
| T3 | 2.4 | 93.0% |  | **ID19** | T0 | 0.1 | 54.0% |
| T4 | 0.8 | 92.0% |  | Tr | 0.3 | 74.0% |
| T5 | 1.3 | 93.0% |  | **ID20** | T0 | 0.1 | 65.0% |
| Tr | 1.3 | 91.0% |  | T1 | NA | NA |
| **ID09** | T0 | 0.2 | 73.0% |  | Tr | 0.1 | 73.0% |
| T1 | 0.1 | 68.0% |  | **ID21** | T0 | 0.2 | 76.0% |
| T2 | 0.1 | 73.0% |  | T1 | 0.1 | 64.0% |
| T3 | 0.2 | 32.0% |  | T2 | 0.2 | 64.0% |
| T4 | NA | NA |  | T3 | 0.2 | 71.0% |
| T5 | 0.1 | NA |  | T4 | 0.3 | 77.0% |
| **ID10** | T0 | 0.1 | NA |  | Tr | 0.3 | 80.0% |
| Tr | 0.1 | NA |  | **ID22** | T0 | 0.2 | 53.0% |
| **ID11** | T0 | 0.1 | 73.0% |  | T1 | 0.2 | 72.0% |
| T1 | 0.2 | 69.0% |  | T2 | 0.1 | 62.0% |
| Tr | 0.3 | 81.0% |  |  |  |  |  |

**Supplementary table 1***:* CfDNA abundance measured by microfluidic system in longitudinal series of plasma samples.

*Abbreviations*: T0 (Baseline timepoint); T1 (first longitudinal timepoint); Tr (resistance timepoint)
